# Supplementary material for: Benchmarking sampling methodology for calculations of Rayleigh light scattering properties of atmospheric molecular clusters
Source: Royal Society of Chemistry journal article supplement (doi:10.1039/c9cp02573a), 2019-01-01
Supplement: c9cp02573a1.pdf [file c9cp02573a1.pdf]

## Supporting Information

### 1. Quasi-Harmonic approximation

A feature of a highly hydrogen bonded system is the existence of low-frequency vibrations with frequencies as low 5-10cm<sup>-1</sup>. These vibrations are poorly described by the harmonic approximation and the paper also considers the importance of describing these vibrations. A quasi-harmonic approach introduced by Grimme<sup>69</sup> will be used to look at the Rayleigh scattering. The uncertainty within the harmonic approximation originates from the vibrational entropy contribution given as:

$$S_V = R \left[ \frac{h\omega}{k_B T \left( e^{\frac{h\omega}{k_B T}} - 1 \right)} - \ln \left( 1 - e^{-\frac{h\omega}{k_B T}} \right) \right] \quad (\text{S1})$$

where R is the gas constant, h is the Planck constant,  $\omega$  is the frequency,  $k_B$  is the Boltzmann constant and T is the temperature. The last term in equation S1 asymptotically goes towards minus infinity as the frequencies goes to zero, which creates inaccuracies.

To avoid this behavior the quasi-harmonic approach treats all low-frequency vibrations as rotations instead<sup>69</sup>. These low-frequency vibrations are often not a classical vibrational motion but rather a unison pivotal motion of the atoms. Instead of using the vibrational entropy for low-frequency vibrations the entropy contribution will be calculated as follows:

$$S_R = R \left\{ \frac{1}{2} + \ln \left[ \left( \frac{8\pi^3 \mu' kT}{h^2} \right)^{\frac{1}{2}} \right] \right\} \quad (\text{S2})$$

where  $\mu'$  is the effective moment of inertia, which is calculated from the moment of inertia for a free rotor,  $\mu$ , and is restricted to a reasonable value by introducing an average molecular moment of inertia,  $B_{av}$ , as a limiting value for very small frequencies. A limiting value of  $B_{av}$  is set to 10<sup>-44</sup> kg m<sup>2</sup> for very small frequencies.

$$\mu' = \frac{\mu B_{av}}{\mu + B_{av}} \quad (\text{S3})$$

To be able to interpolate between the harmonic and the quasi-harmonic approximation throughout the frequencies a weighting function (eq. S4) is used to combine  $S_R$  and  $S_V$ . The weighting function,  $W(\omega)$  is calculated by introducing a Head-Gordon damping function<sup>63</sup>, where  $\alpha=4$ . This damping function is shown in equation S5.

$$S = w(\omega)S_V + [1 - w(\omega)]S_R \quad (\text{S4})$$

$$w(\omega) = \frac{1}{1 + (\omega_0/\omega)^\alpha} \quad (\text{S5})$$

## 2. Rayleigh scattering

Plots containing non-normalized Rayleigh scattering both in the harmonic and quasi-harmonic approximation and normalized Rayleigh scattering were shown in the main article. The following tables will show the values of the normalized and non-normalized Rayleigh scattering in both the harmonic and quasi-harmonic approximation. Furthermore, the tables will show the normalization factor (Sum of Boltzmann factors) that is used to normalized the non-normalized Rayleigh scattering.

**Table S2.1:  $(\text{H}_2\text{O}_2)(\text{H}_2\text{O})$**

| $(\text{H}_2\text{O}_2)(\text{H}_2\text{O})_1$ - Harmonic      | PM6    | PM7    | $\omega\text{B97X-D/6-31G}$ | $\omega\text{B97X-D/6-31++G(d,p)}$ (PLUS) |
|----------------------------------------------------------------|--------|--------|-----------------------------|-------------------------------------------|
| Non-normalized Rayleigh scattering ( $A_0^3$ )                 | 59,398 | 35,953 | 27,457                      | 37,302                                    |
| Normalization factor                                           | 2.13   | 1.30   | 1.00                        | 2.18                                      |
| Normalized Rayleigh scattering ( $A_0^3$ )                     | 27,839 | 27,586 | 27,456                      | 27,577                                    |
| Percentage of PLUS                                             | 100.95 | 100.03 | 99.56                       | 100                                       |
| $(\text{H}_2\text{O}_2)(\text{H}_2\text{O})_1$ -Quasi-harmonic |        |        |                             |                                           |
| Non-normalized Rayleigh scattering ( $A_0^3$ )                 | 56,725 | 30,050 | 27,457                      | 56,402                                    |
| Sum of Boltzmann factors                                       | 2.06   | 1.09   | 1.00                        | 2.05                                      |
| Normalized Rayleigh scattering ( $A_0^3$ )                     | 27529  | 27489  | 27456                       | 27530                                     |
| Percentage of Normalized PLUS Rayleigh scattering              | 100.00 | 99.85  | 99.73                       | 100                                       |

**Table S2.2:  $(\text{H}_2\text{O}_2)(\text{H}_2\text{O})_2$**

| $(\text{H}_2\text{O}_2)(\text{H}_2\text{O})_2$ - Harmonic | PM6     | PM7    | $\omega\text{B97X-D/6-31G}$ | $\omega\text{B97X-D/6-31++G(d,p)}$ (PLUS) |
|-----------------------------------------------------------|---------|--------|-----------------------------|-------------------------------------------|
| Non-normalized Rayleigh scattering ( $A_0^3$ )            | 115,900 | 67,336 | 73,016                      | 107,219                                   |
| Sum of Boltzmann factors                                  | 2.14    | 1.25   | 1.35                        | 1.98                                      |
| Normalized Rayleigh scattering ( $A_0^3$ )                | 54204   | 54024  | 54123                       | 54212                                     |
| Percentage of PLUS                                        | 99.99   | 99.65  | 99.84                       | 100                                       |

| <b>(H<sub>2</sub>O<sub>2</sub>)(H<sub>2</sub>O)<sub>2</sub> - Quasi-harmonic</b> |         |        |        |         |
|----------------------------------------------------------------------------------|---------|--------|--------|---------|
| Non-normalized Rayleigh scattering (A <sub>0</sub> <sup>3</sup> )                | 106,723 | 63,858 | 69,838 | 101,068 |
| Sum of Boltzmann factors                                                         | 1.97    | 1.18   | 1.29   | 1.86    |
| Normalized Rayleigh scattering (A <sub>0</sub> <sup>3</sup> )                    | 54187   | 54044  | 54107  | 54198   |
| Percentage of Normalized PLUS Rayleigh scattering                                | 99.98   | 99.72  | 99.83  | 100     |

**Table S2.3: (H<sub>2</sub>O<sub>2</sub>)(H<sub>2</sub>O)<sub>3</sub>**

| <b>(H<sub>2</sub>O<sub>2</sub>)(H<sub>2</sub>O)<sub>3</sub> - Harmonic</b>       | <b>PM6</b> | <b>PM7</b> | <b>ωB97X-D/<br/>6-31G</b> | <b>ωB97X-D/<br/>6-31++G(d,p)<br/>(PLUS)</b> |
|----------------------------------------------------------------------------------|------------|------------|---------------------------|---------------------------------------------|
| Non-normalized Rayleigh scattering (A <sub>0</sub> <sup>3</sup> )                | 181,220    | 144,531    | 184,297                   | 212,102                                     |
| Sum of Boltzmann factors                                                         | 2.01       | 2.22       | 2.06                      | 2.95                                        |
| Normalized Rayleigh scattering (A <sub>0</sub> <sup>3</sup> )                    | 90085      | 90012      | 89575                     | 90273                                       |
| Percentage of PLUS                                                               | 99.79      | 99.71      | 99.23                     | 100                                         |
| <b>(H<sub>2</sub>O<sub>2</sub>)(H<sub>2</sub>O)<sub>3</sub> - Quasi-harmonic</b> |            |            |                           |                                             |
| Non-normalized Rayleigh scattering (A <sub>0</sub> <sup>3</sup> )                | 176,575    | 179,884    | 197,518                   | 300,130                                     |
| Sum of Boltzmann factors                                                         | 1.96       | 2.00       | 2.20                      | 3.32                                        |
| Normalized Rayleigh scattering (A <sub>0</sub> <sup>3</sup> )                    | 90069      | 89996      | 89653                     | 90371                                       |
| Percentage of PLUS                                                               | 99.67      | 99.58      | 99.21                     | 100                                         |

**Table S2.4: (H<sub>2</sub>O<sub>2</sub>)(H<sub>2</sub>O)<sub>4</sub>**

| <b>(H<sub>2</sub>O<sub>2</sub>)(H<sub>2</sub>O)<sub>4</sub> - Harmonic</b>           | <b>PM6</b> | <b>PM7</b> | <b>ωB97X-D/<br/>6-31G</b> | <b>ωB97X-D/<br/>6-31++G(d,p)<br/>(PLUS)</b> |
|--------------------------------------------------------------------------------------|------------|------------|---------------------------|---------------------------------------------|
| Non-normalized Rayleigh scattering (A <sub>0</sub> <sup>3</sup> )                    | 376,733    | 419,294    | 353,172                   | 538,758                                     |
| Sum of Boltzmann factors                                                             | 2.79       | 3.10       | 2.63                      | 4.01                                        |
| Normalized Rayleigh scattering (A <sub>0</sub> <sup>3</sup> )                        | 135011     | 135083     | 134377                    | 134504                                      |
| Percentage of PLUS                                                                   | 100.38     | 100.43     | 99.91                     | 100                                         |
| <b>(H<sub>2</sub>O<sub>2</sub>)(H<sub>2</sub>O)<sub>4</sub> -<br/>Quasi-harmonic</b> |            |            |                           |                                             |
| Non-normalized Rayleigh scattering (A <sub>0</sub> <sup>3</sup> )                    | 509,565    | 487,374    | 396,220                   | 569,024                                     |
| Sum of Boltzmann factors                                                             | 3.79       | 3.61       | 2.97                      | 4.25                                        |
| Normalized Rayleigh scattering (A <sub>0</sub> <sup>3</sup> )                        | 134545     | 134936     | 133608                    | 133998                                      |
| Percentage of PLUS                                                                   | 100.41     | 100.70     | 99.71                     | 100                                         |

**Table S2.5: (H<sub>2</sub>O<sub>2</sub>)(H<sub>2</sub>O)<sub>5</sub>**

| <b>(H<sub>2</sub>O<sub>2</sub>)(H<sub>2</sub>O)<sub>5</sub> - Harmonic</b>           | <b>PM6</b> | <b>PM7</b> | <b>ωB97X-D/<br/>6-31G</b> | <b>ωB97X-D/<br/>6-31++G(d,p)<br/>(PLUS)</b> |
|--------------------------------------------------------------------------------------|------------|------------|---------------------------|---------------------------------------------|
| Non-normalized Rayleigh scattering (A <sub>0</sub> <sup>3</sup> )                    | 699,511    | 1,788,745  | 1,909,433                 | 1,310,511                                   |
| Normalization factor                                                                 | 3.76       | 9.52       | 10.29                     | 7.03                                        |
| Normalized Rayleigh scattering (A <sub>0</sub> <sup>3</sup> )                        | 186067     | 187776     | 185573                    | 186524                                      |
| Percentage of PLUS                                                                   | 99.76      | 99.49      | 100.67                    | 100                                         |
| <b>(H<sub>2</sub>O<sub>2</sub>)(H<sub>2</sub>O)<sub>5</sub> -<br/>Quasi-harmonic</b> |            |            |                           |                                             |
| Non-normalized Rayleigh scattering (A <sub>0</sub> <sup>3</sup> )                    | 1,815,811  | 1,418,151  | 1,439,901                 | 1,750,516                                   |

|                                            |        |        |        |        |
|--------------------------------------------|--------|--------|--------|--------|
| Sum of Boltzmann factors                   | 9.84   | 7.67   | 7.79   | 9.54   |
| Normalized Rayleigh scattering ( $A_0^3$ ) | 184503 | 184993 | 184955 | 183462 |
| Percentage of PLUS                         | 100.57 | 100.83 | 100.81 | 100    |

### 3: Isotropic and anisotropic polarizabilities

Table S3.1: Isotropic and anisotropic polarizabilities and pure molecular Rayleigh scattering for all 48 conformers in the PLUS-pathway for  $(H_2O_2)(H_2O)_5$ . Sorted by Gibbs free energy with conformer 1 being the lowest Gibbs free energy conformer.

| Conformer | Isotropic polarizability ( $a_0$ ) | Anisotropic polarizability ( $a_0$ ) | Molecular Rayleigh ( $A_0^3$ ) |
|-----------|------------------------------------|--------------------------------------|--------------------------------|
| 1         | 64.48                              | 9.36                                 | 188234.1                       |
| 2         | 64.28                              | 10.35                                | 187328.9                       |
| 3         | 63.83                              | 7.22                                 | 184019.8                       |
| 4         | 64.54                              | 14.14                                | 190042.7                       |
| 5         | 64.71                              | 12.61                                | 190499.4                       |
| 6         | 64.78                              | 14.85                                | 191707.0                       |
| 7         | 64.38                              | 14.05                                | 189081.5                       |
| 8         | 64.64                              | 14.31                                | 190686.9                       |
| 9         | 64.5                               | 7.97                                 | 188037.0                       |
| 10        | 63.85                              | 6.57                                 | 184018.2                       |
| 11        | 63.85                              | 6.85                                 | 184067.0                       |
| 12        | 64.67                              | 7.53                                 | 188936.5                       |
| 13        | 63.48                              | 6.24                                 | 181843.2                       |
| 14        | 64.07                              | 11.6                                 | 186472.7                       |
| 15        | 63.95                              | 3.63                                 | 184203.4                       |
| 16        | 64.77                              | 14.56                                | 191537.8                       |
| 17        | 63.92                              | 4.25                                 | 184094.3                       |
| 18        | 64.22                              | 10.07                                | 186907.6                       |
| 19        | 64.28                              | 8.55                                 | 186886.7                       |
| 20        | 64.65                              | 10.01                                | 189385.6                       |
| 21        | 64.06                              | 9.85                                 | 185927.1                       |
| 22        | 63.58                              | 8.72                                 | 182897.2                       |
| 23        | 64.01                              | 5.62                                 | 184788.2                       |
| 24        | 63.31                              | 6.33                                 | 180887.9                       |
| 25        | 62.89                              | 7.4                                  | 178693.7                       |
| 26        | 63.39                              | 3.46                                 | 180978.8                       |
| 27        | 64.06                              | 12.23                                | 186610.2                       |
| 28        | 63.89                              | 6.4                                  | 184219.4                       |
| 29        | 63.91                              | 4.67                                 | 184085.5                       |
| 30        | 64                                 | 9.9                                  | 185594.1                       |
| 31        | 63.85                              | 5                                    | 183782.0                       |
| 32        | 64.1                               | 14.07                                | 187470.0                       |

|    |       |       |          |
|----|-------|-------|----------|
| 33 | 62.9  | 7.72  | 178813.2 |
| 34 | 64.19 | 14.58 | 188179.5 |
| 35 | 64.18 | 13.39 | 187689.1 |
| 36 | 63.94 | 5.42  | 184356.5 |
| 37 | 63.09 | 6.2   | 179615.4 |
| 38 | 64.45 | 10.48 | 188348.9 |
| 39 | 63.84 | 7.2   | 184073.5 |
| 40 | 63.86 | 7.38  | 184222.5 |
| 41 | 64.17 | 8.24  | 186183.2 |
| 42 | 64.33 | 10.61 | 187689.1 |
| 43 | 64.28 | 13.23 | 188211.8 |
| 44 | 63.39 | 7.19  | 181495.2 |
| 45 | 63.21 | 5.38  | 180174.0 |
| 46 | 63.54 | 6.52  | 182232.6 |
| 47 | 64.06 | 8.54  | 185613.9 |
| 48 | 64.01 | 5.07  | 184711.8 |

In table S3.1 it is clear that the isotropic polarizabilities changes

very little across all 48 conformers within the PLUS pathway for  $(\text{H}_2\text{O}_2)(\text{H}_2\text{O})_5$ . The anisotropic polarizability though changes significantly depending on the conformer. We see values ranging from  $3.46a_0$  to  $14.61a_0$ . In percentage of the isotropic contribution this ranges all the way from 5% to 23%. The tendency of very small differences in the isotropic polarizability is consistent for all  $(\text{H}_2\text{O}_2)(\text{H}_2\text{O})_{1-5}$ . The anisotropic polarizability varies more than the isotropic for all  $(\text{H}_2\text{O}_2)(\text{H}_2\text{O})_5$  although it is more significant for the bigger clusters  $(\text{H}_2\text{O}_2)(\text{H}_2\text{O})_{4,5}$ .
